# Supplementary material for: Immunopathology in PMM2-CDG: Defective glycosylation impact in the TNFα -TNFR1 signalling pathway
Source: Front Immunol. 2025 Sep 18;16:1655354. doi: 10.3389/fimmu.2025.1655354 (PMC12488661; doi:10.3389/fimmu.2025.1655354)
Supplement: Supplementary Table 2 — Cell-cell predicted interactions based the DEG of WT and PMM2-CDG TNF-α stimulated fibroblasts and on ligand/receptor gene expressions [file Table2.xlsx]

## Sheet: Legend
Legend
Sheet	Description
Fibroblast_immune interactions	List of putative receptor-ligand pairs based on the genes that are differentially expressed upon TNF-alpha stimulation (DEG) in WT and PMM2-CDG fibroblasts, obtained from the Supplementary Data 2 of a recent article related to the FANTOM 5 project (44). Each pair has its ligand and receptor described as well as which one is differentially expressed in the stimulated fibroblasts (DEGs_fibroblasts …
Immune cells expression	Gene expression (transcripts per million) of receptors and ligands possibly present in immune cells of the receptor-ligand pairs described in the Fibroblasts_immune interactions sheet, obtained from the Supplementary Data 4 of a recent article related to the FANTOM 5 project (44). According to previous reports, we considered a cell type to express a certain gene if they have more than 10 transcri…

## Sheet: Fibroblast_immune_interactions
Pair.Name	Ligand.ApprovedSymbol	Ligand.Name	Receptor.ApprovedSymbol	Receptor.Name	Select interactions	Fibroblasts	Other cell	Present in immune cell?	Which?	CD14+ Monocytes	CD14+CD16+ Monocytes	CD14+CD16- Monocytes	CD14-CD16+ Monocytes	B cells	CD4+ T cells	CD4+CD25+CD45RA+ naive regulatory T cells	CD4+CD25+CD45RA- memory regulatory T cells	CD4+CD25-CD45RA+ naive conventional T cells	CD4+CD25-CD45RA- memory conventional T cells	CD8+ T cells	Dendritic Monocyte Immature derived	Dendritic Plasmacytoid	Eosinophils	Macrophages	NK cells	Neutrophils
ANXA1_EGFR	ANXA1	annexin A1	EGFR	epidermal growth factor receptor	1	EGFR	ANXA1	1		1	1	1	1	1	1	1	1	1	1	1	1	1	1	1	1	1
BDNF_DRD4	BDNF	brain-derived neurotrophic factor	DRD4	dopamine receptor D4	1	BDNF	DRD4	1														1
BDNF_NGFRAP1	BDNF	brain-derived neurotrophic factor	NGFRAP1	nerve growth factor receptor (TNFRSF16) associated protein 1	1	BDNF	NGFRAP1	1		0	0	0	0	0	1	1	1	1	1	1	0	0	0	1	0	0
BDNF_SORT1	BDNF	brain-derived neurotrophic factor	SORT1	sortilin 1	1	BDNF	SORT1	1		1	1	1	1	0	0	0	0	0	0	0	1	1	1	1	0	1
CAMP_EGFR	CAMP	cathelicidin antimicrobial peptide	EGFR	epidermal growth factor receptor	1	EGFR	CAMP	1															1
CCL2_CCR1	CCL2	chemokine (C-C motif) ligand 2	CCR1	chemokine (C-C motif) receptor 1	1	CCL2	CCR1	1		1	1	1	1								1		1	1		1
CCL2_CCR2	CCL2	chemokine (C-C motif) ligand 2	CCR2	chemokine (C-C motif) receptor 2	1	CCL2	CCR2	1		1										1		1
CCL2_CCR3	CCL2	chemokine (C-C motif) ligand 2	CCR3	chemokine (C-C motif) receptor 3	1	CCL2	CCR3	1												1			1			1
CCL2_CCR4	CCL2	chemokine (C-C motif) ligand 2	CCR4	chemokine (C-C motif) receptor 4	1	CCL2	CCR4	1		1										1			1		1
CCL2_CCR5	CCL2	chemokine (C-C motif) ligand 2	CCR5	chemokine (C-C motif) receptor 5 (gene/pseudogene)	1	CCL2	CCR5	1
CCL5_CCR1	CCL5	chemokine (C-C motif) ligand 5	CCR1	chemokine (C-C motif) receptor 1	1	CCL5	CCR1	1		1	1	1	1								1		1	1		1
CCL5_CCR3	CCL5	chemokine (C-C motif) ligand 5	CCR3	chemokine (C-C motif) receptor 3	1	CCL5	CCR3	1												1			1			1
CCL5_CCR4	CCL5	chemokine (C-C motif) ligand 5	CCR4	chemokine (C-C motif) receptor 4	1	CCL5	CCR4	1		1										1			1		1
CCL5_CCR5	CCL5	chemokine (C-C motif) ligand 5	CCR5	chemokine (C-C motif) receptor 5 (gene/pseudogene)	1	CCL5	CCR5	1								1	1	1	1	1	1	1		1
CCL5_CXCR3	CCL5	chemokine (C-C motif) ligand 5	CXCR3	chemokine (C-X-C motif) receptor 3	1	CCL5	CXCR3	1												1		1			1
CCL5_SDC4	CCL5	chemokine (C-C motif) ligand 5	SDC4	syndecan 4	1	CCL5, SDC4	SDC4	1		1	0	0	0	0	0	0	1	0	0	0	1	0	0	1	1	0
CCL7_CCR1	CCL7	chemokine (C-C motif) ligand 7	CCR1	chemokine (C-C motif) receptor 1	1	CCL7	CCR1	1		1	1	1	1								1		1	1		1
CCL7_CCR2	CCL7	chemokine (C-C motif) ligand 7	CCR2	chemokine (C-C motif) receptor 2	1	CCL7	CCR2	1		1										1		1
CCL7_CCR3	CCL7	chemokine (C-C motif) ligand 7	CCR3	chemokine (C-C motif) receptor 3	1	CCL7	CCR3	1												1			1			1
CCL7_CCR5	CCL7	chemokine (C-C motif) ligand 7	CCR5	chemokine (C-C motif) receptor 5 (gene/pseudogene)	1	CCL7	CCR5	1								1	1	1	1	1	1	1		1
CCL7_CXCR3	CCL7	chemokine (C-C motif) ligand 7	CXCR3	chemokine (C-X-C motif) receptor 3	1	CCL7	CXCR3	1												1		1			1
CD70_CD27	CD70	CD70 molecule	CD27	CD27 molecule	1	CD70	CD27	1		0	0	0	0	1	1	1	1	1	1	1	0	0	0	0	1	0
CDH1_EGFR	CDH1	cadherin 1, type 1, E-cadherin (epithelial)	EGFR	epidermal growth factor receptor	1	EGFR	CDH1	1														1
COL1A1_CD44	COL1A1	collagen, type I, alpha 1	CD44	CD44 molecule (Indian blood group)	1	CD44	COL1A1	1		1	0	0	0	0	0	0	0	0	0	0	0	0	0	0	0	0
COL1A2_CD44	COL1A2	collagen, type I, alpha 2	CD44	CD44 molecule (Indian blood group)	1	CD44	COL1A2	1		1	0	0	0	0	0	0	0	0	0	0	0	0	0	0	0	0
CXCL10_SDC4	CXCL10	chemokine (C-X-C motif) ligand 10	SDC4	syndecan 4	1	SDC4	CXCL10	1		0	1	1	1	0	0	0	0	0	0	0	0	0	0	0	0	0
CXCL1_CXCR1	CXCL1	chemokine (C-X-C motif) ligand 1 (melanoma growth stimulating activity, alpha)	CXCR1	chemokine (C-X-C motif) receptor 1	1	CXCL1	CXCR1	1															1			1
CXCL1_CXCR2	CXCL1	chemokine (C-X-C motif) ligand 1 (melanoma growth stimulating activity, alpha)	CXCR2	chemokine (C-X-C motif) receptor 2	1	CXCL1	CXCR2	1												1			1			1
CXCL2_CXCR1	CXCL2	chemokine (C-X-C motif) ligand 2	CXCR1	chemokine (C-X-C motif) receptor 1	1	CXCL2	CXCR1	1															1			1
CXCL2_CXCR2	CXCL2	chemokine (C-X-C motif) ligand 2	CXCR2	chemokine (C-X-C motif) receptor 2	1	CXCL2	CXCR2	1												1			1			1
CXCL3_CXCR1	CXCL3	chemokine (C-X-C motif) ligand 3	CXCR1	chemokine (C-X-C motif) receptor 1	1	CXCL3	CXCR1	1															1			1
CXCL3_CXCR2	CXCL3	chemokine (C-X-C motif) ligand 3	CXCR2	chemokine (C-X-C motif) receptor 2	1	CXCL3	CXCR2	1												1			1			1
CXCL5_CXCR1	CXCL5	chemokine (C-X-C motif) ligand 5	CXCR1	chemokine (C-X-C motif) receptor 1	1	CXCL5	CXCR1	1															1			1
CXCL5_CXCR2	CXCL5	chemokine (C-X-C motif) ligand 5	CXCR2	chemokine (C-X-C motif) receptor 2	1	CXCL5	CXCR2	1												1			1			1
EREG_EGFR	EREG	epiregulin	EGFR	epidermal growth factor receptor	1	EREG, EGFR	EREG	1		1	1	1	0	0	0	0	0	0	0	0	0	1	1	0	1	1
FGF13_EGFR	FGF13	fibroblast growth factor 13	EGFR	epidermal growth factor receptor	1	EGFR	FGF13	1		0	0	0	0	0	0	0	0	0	0	0	0	0	1	0	0	1
FGF2_CD44	FGF2	fibroblast growth factor 2 (basic)	CD44	CD44 molecule (Indian blood group)	1	FGF2, CD44	CD44	1		1	1	1	1	1	1	1	1	1	1	1	1	1	1	1	1	1
FGF2_FGFR1	FGF2	fibroblast growth factor 2 (basic)	FGFR1	fibroblast growth factor receptor 1	1	FGF2	FGFR1	1		0	0	0	0	0	0	0	1	1	1	0	1	0	0	1	0	0
FGF2_FGFRL1	FGF2	fibroblast growth factor 2 (basic)	FGFRL1	fibroblast growth factor receptor-like 1	1	FGF2	FGFRL1	1		1	0	0	1	0	0	0	0	0	0	0	1	0	0	0	1	0
FGF2_GPC4	FGF2	fibroblast growth factor 2 (basic)	GPC4	glypican 4	1	FGF2	GPC4	1		1	0	0	0	0	0	0	0	0	0	0	0	0	0	1	0	0
FGF2_NRP1	FGF2	fibroblast growth factor 2 (basic)	NRP1	neuropilin 1	1	FGF2	NRP1	1		1	0	0	0	0	0	0	0	0	0	0	1	1	0	1	0	0
FGF2_SDC2	FGF2	fibroblast growth factor 2 (basic)	SDC2	syndecan 2	1	FGF2	SDC2	1		1	0	1	0	0	0	0	0	0	0	0	1	0	1	1	0	1
FGF2_SDC3	FGF2	fibroblast growth factor 2 (basic)	SDC3	syndecan 3	1	FGF2	SDC3	1		0	0	0	0	0	0	0	0	0	0	0	1	0	0	1	0	0
FGF2_SDC4	FGF2	fibroblast growth factor 2 (basic)	SDC4	syndecan 4	1	FGF2, SDC4	SDC4	1		1	0	0	0	0	0	0	1	0	0	0	1	0	0	1	1	0
FN1_CD44	FN1	fibronectin 1	CD44	CD44 molecule (Indian blood group)	1	CD44	FN1	1		1	0	0	0	0	0	0	0	0	0	0	1	0	0	1	0	0
GNAI2_EGFR	GNAI2	guanine nucleotide binding protein (G protein), alpha inhibiting activity polypeptide 2	EGFR	epidermal growth factor receptor	1	EGFR	GNAI2	1		1	1	1	1	1	1	1	1	1	1	1	1	1	1	1	1	1
GNAI2_S1PR1	GNAI2	guanine nucleotide binding protein (G protein), alpha inhibiting activity polypeptide 2	S1PR1	sphingosine-1-phosphate receptor 1	1	S1PR1	GNAI2	1		1	1	1	1	1	1	1	1	1	1	1	1	1	1	1	1	1
GNAI2_S1PR3	GNAI2	guanine nucleotide binding protein (G protein), alpha inhibiting activity polypeptide 2	S1PR3	sphingosine-1-phosphate receptor 3	1	S1PR3	GNAI2	1		1	1	1	1	1	1	1	1	1	1	1	1	1	1	1	1	1
HBEGF_CD44	HBEGF	heparin-binding EGF-like growth factor	CD44	CD44 molecule (Indian blood group)	1	HBEGF, CD44	HBEGF	1		1	1	1	0	0	0	0	0	0	0	0	0	0	0	1	0	0
HBEGF_CD44	HBEGF	heparin-binding EGF-like growth factor	CD44	CD44 molecule (Indian blood group)	1	HBEGF, CD44	CD44	1		1	1	1	1	1	1	1	1	1	1	1	1	1	1	1	1	1
HBEGF_CD82	HBEGF	heparin-binding EGF-like growth factor	CD82	CD82 molecule	1	HBEGF, CD82	HBEGF	1		1	1	1	0	0	0	0	0	0	0	0	0	0	0	1	0	0
HBEGF_CD82	HBEGF	heparin-binding EGF-like growth factor	CD82	CD82 molecule	1	HBEGF, CD82	CD82	1		1	1	1	0	1	1	1	1	1	1	1	1	1	1	1	1	1
HBEGF_CD9	HBEGF	heparin-binding EGF-like growth factor	CD9	CD9 molecule	1	HBEGF	CD9	1			1	1		1							1		1	1		1
HBEGF_EGFR	HBEGF	heparin-binding EGF-like growth factor	EGFR	epidermal growth factor receptor	1	HBEGF, EGFR	HBEGF	1		1	1	1	0	0	0	0	0	0	0	0	0	0	0	1	0	0
HBEGF_PRLR	HBEGF	heparin-binding EGF-like growth factor	PRLR	prolactin receptor	1	HBEGF	PRLR	1		1	0	0	0	0	0	0	0	0	0	0	0	0	0	0	0	0
HGF_CD44	HGF	hepatocyte growth factor (hepapoietin A; scatter factor)	CD44	CD44 molecule (Indian blood group)	1	CD44	HGF	1		0	1	1	1	0	0	0	0	0	0	0	0	0	0	0	0	0
HSP90AA1_EGFR	HSP90AA1	heat shock protein 90kDa alpha (cytosolic), class A member 1	EGFR	epidermal growth factor receptor	1	EGFR	HSP90AA1	1		1	1	1	1	1	1	1	1	1	1	1	1	1	1	1	1	1
ICAM1_EGFR	ICAM1	intercellular adhesion molecule 1	EGFR	epidermal growth factor receptor	1	ICAM1, EGFR	ICAM1	1		1	1	1	1	1	1	0	1	1	0	1	1	1	1	1	1	1
ICAM1_IL2RA	ICAM1	intercellular adhesion molecule 1	IL2RA	interleukin 2 receptor, alpha	1	ICAM1	IL2RA	1		0	0	0	0	1	1	1	1	1	1	1	0	0	1	1	1	0
ICAM1_IL2RG	ICAM1	intercellular adhesion molecule 1	IL2RG	interleukin 2 receptor, gamma	1	ICAM1	IL2RG	1		1	1	1	1	1	1	1	1	1	1	1	1	1	1	1	1	1
ICAM1_ITGAL	ICAM1	intercellular adhesion molecule 1	ITGAL	integrin, alpha L (antigen CD11A (p180), lymphocyte function-associated antigen 1; alpha polypeptide)	1	ICAM1	ITGAL	1		1	1	1	1	1	1	1	1	1	1	1	0	1	1	1	1	1
ICAM1_ITGAM	ICAM1	intercellular adhesion molecule 1	ITGAM	integrin, alpha M (complement component 3 receptor 3 subunit)	1	ICAM1	ITGAM	1		1	1	1	1	1	0	1	1	1	1	1	1	0	1	1	1	1
ICAM1_ITGAX	ICAM1	intercellular adhesion molecule 1	ITGAX	integrin, alpha X (complement component 3 receptor 4 subunit)	1	ICAM1	ITGAX	1		1	1	1	1	1	0	0	0	0	0	1	1	1	1	1	1	1
ICAM1_ITGB2	ICAM1	intercellular adhesion molecule 1	ITGB2	integrin, beta 2 (complement component 3 receptor 3 and 4 subunit)	1	ICAM1	ITGB2	1		1	1	1	1	1	1	1	1	1	1	1	1	1	1	1	1	1
IFNG_IFNGR2	IFNG	interferon, gamma	IFNGR2	interferon gamma receptor 2 (interferon gamma transducer 1)	1	IFNGR2	IFNG	1		1	0	0	0	0	1	0	0	0	1	1	0	0	0	0	1	0
IL15_IL15RA	IL15	interleukin 15	IL15RA	interleukin 15 receptor, alpha	1	IL15	IL15RA	1		1	1	1	0	0	0	0	1	0	0	0	0	0	0	0	1	0
IL15_IL2RA	IL15	interleukin 15	IL2RA	interleukin 2 receptor, alpha	1	IL15	IL2RA	1		0	0	0	0	1	1	1	1	1	1	1	0	0	1	1	1	0
IL15_IL2RB	IL15	interleukin 15	IL2RB	interleukin 2 receptor, beta	1	IL15	IL2RB	1		1	0	0	0	0	1	1	1	1	1	1	0	0	1	0	1	0
IL15_IL2RG	IL15	interleukin 15	IL2RG	interleukin 2 receptor, gamma	1	IL15	IL2RG	1		1	1	1	1	1	1	1	1	1	1	1	1	1	1	1	1	1
IL1B_ADRB2	IL1B	interleukin 1, beta	ADRB2	adrenoceptor beta 2, surface	1	IL1B	ADRB2	1		1	1	1	1	1	1	0	0	0	1	1	0	1	1	1	1	1
IL1B_IL1R1	IL1B	interleukin 1, beta	IL1R1	interleukin 1 receptor, type I	1	IL1B	IL1R1	1		1	0	0	0	0	0	0	1	0	0	0	1	0	1	0	0	1
IL1B_IL1R2	IL1B	interleukin 1, beta	IL1R2	interleukin 1 receptor, type II	1	IL1B	IL1R2	1		0	0	0	0	0	0	0	0	0	0	0	1	0	1	0	0	1
IL1B_IL1RAP	IL1B	interleukin 1, beta	IL1RAP	interleukin 1 receptor accessory protein	1	IL1B	IL1RAP	1		1	0	1	0	0	1	0	0	0	0	0	1	0	1	0	0	1
IL34_CSF1R	IL34	interleukin 34	CSF1R	colony stimulating factor 1 receptor	1	IL34	CSF1	1		1	0	0	0	0	0	0	1	0	0	0	1	0	1	1	0	1
IL6_F3	IL6	interleukin 6 (interferon, beta 2)	F3	coagulation factor III (thromboplastin, tissue factor)	1	IL6	F3	1		1	0	0	0	0	0	0	0	0	0	0	0	0	0	1	0	0
IL6_IL6R	IL6	interleukin 6 (interferon, beta 2)	IL6R	interleukin 6 receptor	1	IL6	IL6R	1		1	1	1	1	0	1	1	1	1	1	1	1	1	1	1	1	1
IL6_IL6ST	IL6	interleukin 6 (interferon, beta 2)	IL6ST	interleukin 6 signal transducer (gp130, oncostatin M receptor)	1	IL6	IL6ST	1		1	1	1	1	1	1	1	1	1	1	1	1	1	1	1	1	1
INHBA_ACVR1	INHBA	inhibin, beta A	ACVR1	activin A receptor, type I	1	INHBA	ACVR1	1		1					1	1	1		1	1	1			1
INHBA_ACVR1B	INHBA	inhibin, beta A	ACVR1B	activin A receptor, type IB	1	INHBA	ACVR1B	1		1	0	1	1	0	0	0	0	0	0	0	0	0	0	1	0	0
INHBA_ACVR2A	INHBA	inhibin, beta A	ACVR2A	activin A receptor, type IIA	1	INHBA	ACVR2A	1		1	1	1	1	0	1	0	1	1	1	0	0	0	0	1	1	0
INHBA_ENG	INHBA	inhibin, beta A	ENG	endoglin	1	INHBA	ENG	1		1	1	1	1								1			1
INHBA_TGFBR3	INHBA	inhibin, beta A	TGFBR3	transforming growth factor, beta receptor III	1	INHBA	TGFBR3	1		1	0	0	0	0	1	0	1	0	1	1	0	0	0	0	1	0
INHBB_ACVR1	INHBB	inhibin, beta B	ACVR1	activin A receptor, type I	1	INHBB	ACVR1	1		1					1	1	1		1	1	1			1
INHBB_ACVR1B	INHBB	inhibin, beta B	ACVR1B	activin A receptor, type IB	1	INHBB	ACVR1B	1		1		1	1											1
INHBB_ACVR2A	INHBB	inhibin, beta B	ACVR2A	activin A receptor, type IIA	1	INHBB	ACVR2A	1		1	1	1	1	0	1	0	1	1	1	0	0	0	0	1	1	0
JAG1_NOTCH2	JAG1	jagged 1	NOTCH2	notch 2	1	NOTCH2	JAG1	1		1	0	0	0	0	0	0	0	0	0	0	1	1	1	0	0	1
LAMC2_CD151	LAMC2	laminin, gamma 2	CD151	CD151 molecule (Raph blood group)	1	LAMC2	CD151	1		1	1	1	1				1	1			1			1
LAMC2_ITGA3	LAMC2	laminin, gamma 2	ITGA3	integrin, alpha 3 (antigen CD49C, alpha 3 subunit of VLA-3 receptor)	1	LAMC2	ITGA3	1		0	0	0	0	0	0	0	0	0	0	0	1	0	0	1	0	0
LAMC2_ITGA6	LAMC2	laminin, gamma 2	ITGA6	integrin, alpha 6	1	LAMC2	ITGA6	1		0	0	0	0	0	1	1	1	1	1	1	0	0	0	1	1	1
LAMC2_ITGB1	LAMC2	laminin, gamma 2	ITGB1	integrin, beta 1 (fibronectin receptor, beta polypeptide, antigen CD29 includes MDF2, MSK12)	1	LAMC2	ITGB1	1		1	1	1	1	1	1	1	1	1	1	1	1	1	1	1	1	1
LAMC2_ITGB4	LAMC2	laminin, gamma 2	ITGB4	integrin, beta 4	1	LAMC2	ITGB4	1		0	0	0	0	0	0	0	0	0	0	0	0	0	1	0	0	0
LIF_IL6ST	LIF	leukemia inhibitory factor	IL6ST	interleukin 6 signal transducer (gp130, oncostatin M receptor)	1	LIF	IL6	1		1	0	0	0	1	0	0	0	0	0	0	0	0	0	0	0	0
LIF_IL6ST	LIF	leukemia inhibitory factor	IL6ST	interleukin 6 signal transducer (gp130, oncostatin M receptor)	1	LIF	LIF	1		0	0	0	0	0	0	0	1	1	0	0	0	0	0	0	0	0
LPL_CD44	LPL	lipoprotein lipase	CD44	CD44 molecule (Indian blood group)	1	CD44	LPL	1		0	0	0	0	0	0	0	0	0	0	0	1	0	0	1	0	0
MFNG_NOTCH2	MFNG	MFNG O-fucosylpeptide 3-beta-N-acetylglucosaminyltransferase	NOTCH2	notch 2	1	NOTCH2	MFNG	1		1	1	1	1	1	1	1	1	1	1	1	1	1	1	1	1	1
MLLT4_EPHB3	MLLT4	myeloid/lymphoid or mixed-lineage leukemia (trithorax homolog, Drosophila); translocated to, 4	EPHB3	EPH receptor B3	1	EPHB3	MLLT4	1		0	0	0	0	0	0	0	0	0	0	0	0	0	1	0	0	1
MMP7_CD44	MMP7	matrix metallopeptidase 7 (matrilysin, uterine)	CD44	CD44 molecule (Indian blood group)	1	CD44	MMP7	1		0	0	0	0	0	0	0	0	0	0	0	1	0	0	1	0	0
MMP9_CD44	MMP9	matrix metallopeptidase 9 (gelatinase B, 92kDa gelatinase, 92kDa type IV collagenase)	CD44	CD44 molecule (Indian blood group)	1	CD44	MMP9	1		1	0	0	0	0	0	0	0	0	0	0	1	0	1	1	0	1
NCAM1_ROBO1	NCAM1	neural cell adhesion molecule 1	ROBO1	roundabout, axon guidance receptor, homolog 1 (Drosophila)	1	ROBO1	NCAM1	1		0	0	0	0	0	0	0	0	0	0	0	0	0	0	0	1	0
OSM_IL6ST	OSM	oncostatin M	IL6ST	interleukin 6 signal transducer (gp130, oncostatin M receptor)	1		OSM	1		1	1	1	0	0	1	0	1	1	0	0	0	1	1	0	1	1
PDGFB_S1PR1	PDGFB	platelet-derived growth factor beta polypeptide	S1PR1	sphingosine-1-phosphate receptor 1	1	S1PR1	PDGFB	1		1	0	0	0	0	0	0	0	0	0	0	1	0	0	0	0	0
PDGFC_FLT1	PDGFC	platelet derived growth factor C	FLT1	fms-related tyrosine kinase 1	1	FLT1	PDGFB	1		1	0	0	0	0	0	0	0	0	0	0	1	0	0	0	0	0
PIGF_FLT1	PIGF	phosphatidylinositol glycan anchor biosynthesis, class F	FLT1	fms-related tyrosine kinase 1	1	FLT1	PIGF	1		1	1	1	1	1	0	1	1	1	1	1	1	1	0	1	1	0
PKM_CD44	PKM	pyruvate kinase, muscle	CD44	CD44 molecule (Indian blood group)	1	CD44	PKM	1		1	1	1	1	1	1	1	1	1	1	1	1	1	1	1	1	1
PSEN1_CD44	PSEN1	presenilin 1	CD44	CD44 molecule (Indian blood group)	1	CD44	PSEN1	1		1	1	1	1	1	1	1	1	1	1	1	1	1	1	1	1	1
PSEN1_NOTCH2	PSEN1	presenilin 1	NOTCH2	notch 2	1	NOTCH2	PSEN1	1		1	1	1	1	1	1	1	1	1	1	1	1	1	1	1	1	1
SEMA3C_NRP2	SEMA3C	sema domain, immunoglobulin domain (Ig), short basic domain, secreted, (semaphorin) 3C	NRP2	neuropilin 2	1	NRP2	SEMA3C	1		1	0	0	0	0	0	0	0	0	0	0	1	1	0	1	0	0
SEMA4F_NRP2	SEMA4F	sema domain, immunoglobulin domain (Ig), transmembrane domain (TM) and short cytoplasmic domain, (semaphorin) 4F	NRP2	neuropilin 2	1	NRP2	SEMA4F	1		0	0	0	0	0	0	1	1	1	1	0	0	0	0	0	0	0
SPINK1_EGFR	SPINK1	serine peptidase inhibitor, Kazal type 1	EGFR	epidermal growth factor receptor	1	EGFR	SPINK1	1
SPP1_CD44	SPP1	secreted phosphoprotein 1	CD44	CD44 molecule (Indian blood group)	1	CD44	SPP1	1		0	0	0	0	0	0	0	0	0	0	0	1	0	0	1	0	0
SPP1_S1PR1	SPP1	secreted phosphoprotein 1	S1PR1	sphingosine-1-phosphate receptor 1	1	S1PR1	SPP1	1		0	0	0	0	0	0	0	0	0	0	0	1	0	0	1	0	0
TFPI_SDC4	TFPI	tissue factor pathway inhibitor (lipoprotein-associated coagulation inhibitor)	SDC4	syndecan 4	1	SDC4	TFPI	1		0	0	0	0	0	0	0	0	0	0	0	1	1	0	1	0	0
TGFA_EGFR	TGFA	transforming growth factor, alpha	EGFR	epidermal growth factor receptor	1	TGFA, EGFR	TGFA	1		0	0	0	0	0	0	0	0	0	0	0	1	0	1	0	0	1
TGFB1_TGFBR2	TGFB1	transforming growth factor, beta 1	TGFBR2	transforming growth factor, beta receptor II (70/80kDa)	1	TGFBR2	TGFB1	1		1	1	1	1	1	1	1	1	1	1	1	1	1	1	1	1	1
TGM2_SDC4	TGM2	transglutaminase 2	SDC4	syndecan 4	1	SDC4	TGM2	1		0	0	0	0	0	0	0	0	0	0	0	1	0	0	1	0	0
THBS1_SDC4	THBS1	thrombospondin 1	SDC4	syndecan 4	1	SDC4	THBS1	1		1	1	1	0	0	0	0	0	0	0	0	0	1	1	0	1	1
TNFSF10_TNFRSF10B	TNFSF10	tumor necrosis factor (ligand) superfamily, member 10	TNFRSF10B	tumor necrosis factor receptor superfamily, member 10b	1	TNFRSF10B	TNFSF10	1		1	1	1	1	1	1	1	1	1	1	1	0	0	1	1	1	1
VCAN_CD44	VCAN	versican	CD44	CD44 molecule (Indian blood group)	1	CD44	VCAN	1		1	1	1	1	1	0	0	0	0	0	1	0	1	0	1	1	0
VCAN_EGFR	VCAN	versican	EGFR	epidermal growth factor receptor	1	EGFR	VCAN	1		1	1	1	1	1	0	0	0	0	0	1	0	1	0	1	1	0
VEGFA_EGFR	VEGFA	vascular endothelial growth factor A	EGFR	epidermal growth factor receptor	1	EGFR	VEGFA	1		1	0	1	0	0	0	0	0	0	0	0	0	0	1	0	0	1
VEGFA_FLT1	VEGFA	vascular endothelial growth factor A	FLT1	fms-related tyrosine kinase 1	1	FLT1	VEGFA	1		1	0	1	0	0	0	0	0	0	0	0	0	0	1	0	0	1
VEGFA_NRP2	VEGFA	vascular endothelial growth factor A	NRP2	neuropilin 2	1	NRP2	VEGFA	1		1	0	1	0	0	0	0	0	0	0	0	0	0	1	0	0	1
VEGFB_FLT1	VEGFB	vascular endothelial growth factor B	FLT1	fms-related tyrosine kinase 1	1	FLT1	VEGFB	1		0	0	0	0	1	1	1	1	1	1	1	1	1	0	1	1	0
VIM_CD44	VIM	vimentin	CD44	CD44 molecule (Indian blood group)	1	CD44	VIM	1		1	1	1	1	1	1	1	1	1	1	1	1	1	1	1	1	1

## Sheet: Immune cells expression
Gene	CD14+ Monocytes	CD14+CD16+ Monocytes	CD14+CD16- Monocytes	CD14-CD16+ Monocytes	CD19+ B cells	CD4+ T cells	CD4+CD25+CD45RA+ naive regulatory T cells	CD4+CD25+CD45RA- memory regulatory T cells	CD4+CD25-CD45RA+ naive conventional T cells	CD4+CD25-CD45RA- memory conventional T cells	CD8+ T cells	Dendritic Monocyte Immature derived	Dendritic Plasmacytoid	Eosinophils	Macrophage Monocyte derived	NK cells	Neutrophils
ACKR2	0.88	0.42	0.18	0.68	0.83	0.94	1.06	0.5	0.62	1.13	0.8	0.43	1.75	2.64	0.21	1.16	0.14
ACKR4	0	0	0	0	0	0	0	0.02	0	0	0	0	0	0	0	0	0
ACVR1	12.69	4.79	8.03	4.76	3.43	19.91	15.66	24.29	9.91	17.23	10.15	17.59	5.08	2.6	24.21	8.18	5.51
ACVR1A
ACVR1B	11.62	9.37	10.34	12.8	1.4	5.9	2.28	1.42	6.11	2.85	3.27	3.46	3.69	2.64	13.2	4.61	4.46
ACVR2B	0.49	0.42	0.39	0.55	0.77	2.67	3.15	3.23	3.95	3.62	3.81	3.89	2.48	0.66	1.49	1.34	0.28
ADRB2	185.22	31.47	21.97	46.58	20.48	14.26	4.2	3.46	1.7	23.76	68.81	0.42	26.21	29.89	13.39	121.71	22.97
AGR2	0	0	0	0	0	0	0	0.04	0	0.03	0	0	0.12	0	0	0	0
AMH	0	0	0	0	0	0	0	0	0	0	0	0	0	0	0	0	0
ANXA1	643.18	429.11	888.29	394.99	13.28	347.77	18.15	138.79	200.3	704.35	418.31	404.27	49.44	157.26	329.86	308.88	181.32
AREG
AREGB
AVPR2
BAMBI	0.91	0.07	0.09	0.28	0.39	1.53	1.41	0.05	0.17	0.1	0.57	0.09	0.08	0	1.25	1.26	0.66
BCAN	0.07	0.07	0.11	0.07	0	0	0	0.02	0	0.06	0	0	1.48	0	0.05	0.04	0
VEGFA	123.4	9.43	47.56	0.06	1.32	1.81	0.16	0.75	0.66	1.05	0.81	7.43	9.19	158.34	2.43	6.3	20.43
FLT1	32.2	0.35	0.41	0.16	0.18	0.2	0.64	0.15	1.52	0.24	0.26	34.17	0.64	9.73	12.25	0.76	5.35
BTC	0	0	0	0	0	0	0	0	0	0	0.01	0	0.7	0	0.05	0	0
CALM1
CALM2
CALM3
CAMP	0.99	1.2	1.23	2.39	0.48	0	0	0	0	0	0.26	0.04	0.56	50.75	0.18	0.04	40.32
CAV1	2.77	0.07	0	0	2.37	0.07	0	0.2	0.1	0	0.07	0.33	0.08	0	0.13	0.09	0
CCR1	61.72	34.74	83.01	14.34	2.64	0.2	0.29	3.25	2.93	1.39	4.26	147.12	1.89	80.61	161.48	3.32	71.31
CCR10	0	0	0	0	1.36	1.08	0.2	4.97	0.03	1.13	1.59	0	0.19	0	0	0	0
CCR2	5.33	12.37	104.35	0.22	9.24	1.74	7.35	42.58	49.33	38.66	24.75	1.05	77.77	0.66	0.61	1	2.19
CCR3	0.21	0.35	0.39	0.38	1.05	0.07	2.46	11.8	1.66	1.48	1.05	0.04	0.9	41.17	0	0.07	107.36
CCR4	11.42	0	0	0	1	211.5	186.97	699.32	120.96	263.99	65.63	1.28	0.84	12.41	0	43.62	6.84
CCR5	3.34	6.82	2.75	0.37	1.35	2.22	11.1	39.03	22.82	41.64	48.3	44.03	13.56	2.64	52.38	7.32	0.28
CD151	24.27	37.59	29.18	32.96	3.86	4.37	6.19	12.16	12.54	7.02	6.63	88.73	1.9	0	86.4	7.12	5.04
CD40LG	3.86	0	0	0	0.29	54.34	21.52	112.25	321.67	234.29	52.77	0.8	0.81	4.54	0	12.75	1.35
CD44	2132.75	697.36	1274.31	700.27	377.12	1207.9	643.01	687.66	722.14	728.51	649.43	1338.46	319.56	563.17	1290.91	836.59	643.94
CD9	6.2	15.69	17.4	0.47	22.7	0.4	6.44	4.73	3.9	2.63	3.45	122.03	3.66	35.97	403.76	0.64	120.14
CDH1	0.07	0	0	0	0.24	0.41	0.29	0.81	0.02	0.38	1.34	2.59	11.99	0	0.08	0.31	0
COL17A1	0.07	0.07	0	0	0	0	0.04	0	0	0.09	0	0	0	0	0	0	0
CSF1R	120.15	457.79	263.4	600.61	2.61	0.82	0	0.02	0	0.15	6.08	315.14	7.06	2.6	315.66	3.61	22.89
CXCR1	1.07	0.07	1.29	0.16	6.24	0.13	3.05	5.29	1.08	3.2	9.3	2.57	0	818.41	0.59	3.55	775.18
CXCR2	1.48	1.76	7.82	0.92	7.93	0	0	0.1	0.09	0	10.07	0.26	0.31	1077.27	1.33	7.49	1972.48
CXCR3	7.09	0	0.09	0	9.53	27.37	26.7	54.72	31.74	66.69	62.3	0.38	204.15	2.64	0.1	35.59	2.96
DARC	0	0	0	0	0.17	0	0	0	0.04	0	0	0.04	0	0	0	0	0
DCN	1.29	0.07	0	0.06	0.48	0	0	0	0	0	0.03	0.31	0	0	0.05	0	0.14
DDR1	1.27	0.28	0.44	0.1	5.88	1.18	4.24	0.57	3.24	0.89	2.22	0.22	2.07	0	2.24	1.39	0
DRD4	0	0.07	0	0	0	0	0	0	0	0	0.13	0	23.04	0	0	0	0
EFEMP1	8.2	0	0	0	0.41	0	0	0.05	0	0	0.02	0.15	0	0	0	0.13	0
EFNB1	4.28	9.79	5.13	9.44	2.2	3.72	5.1	3.54	4.16	3.31	2.54	3.38	4.81	3.88	5.99	2.55	1.39
EFNB2
EFNB3	0	0	0	0	0	0	0	0	0	0	0.02	0.21	0	0	0	0	0
EGF	0	0	0	0	0.05	0	0	0	0	0	0.02	0	0	0	0.08	0	0.94
EGFR	0	0	0	0	0	0	0	0	0	0	0.01	0	0	0	0	0	0
TGFA	3.7	0.14	0.26	0	0.2	1.2	0	0.05	0.24	0.06	0.98	18.57	0	10.43	0.08	1.9	21.33
ENG	34.97	16.84	21.9	15.29	2.7	3.73	0.21	1.74	6.34	2.42	3.66	72.39	2.9	0	181.83	5.33	0
EPGN	0	0	0.04	0	0	0.59	0	0.02	1.23	0.09	0.1	0	0	0	0	0.14	0
EPHB2	4.87	2.61	5.5	1.29	0.04	0.07	0	0	0	0	0.05	1.56	0.67	0	17.62	0.09	0
ERBB2	2.22	1.05	0.69	0.96	5.63	2.78	2.99	2.75	3.39	2.14	3.17	1.78	1.49	1.94	1.26	3.99	1.39
ERBB3	0	0	0	0	0.06	0	0.5	0.38	1.06	0.24	0.1	0	0	0	0	0	0
ERBB4	0	0.07	0	0	0	0	0	0	0	0.13	0	0	0	0	0	0.04	0
EREG	1219.13	31.6	64.68	2.13	6.59	3.54	0	0.05	0.03	0	0.32	0.33	31.17	45.56	0.4	35.07	10.1
F3	168.66	0.99	0.52	0	1.16	0.07	0	0	0	0	0.02	3.14	2.43	6.48	59.35	2.75	0.14
FGF13	1.66	0.14	0.19	0.1	0	0	0	0	0	0	0.1	0.47	0	40.72	0.23	0.04	10.64
FGL1	0	0	0	0	0	0	0	0	0	0	0.01	0.06	0	0	0	0	0
FIGF	0	0	0	0	0.05	0	0.04	0.02	0	0.06	0	0	0	0	0	0	0
GNAI2	963.75	913.3	967.09	867.92	293.78	331.66	271.03	421.83	344.68	293.47	322.15	887.95	463.34	2509.79	852.98	372.42	2334.93
GPC1	0.64	0	0.05	0.13	0.51	0.73	0.21	1.37	0.86	1.48	0.54	0.97	0.08	0	0.93	0.61	0
GPR75	0	0	0	0	0	0	0	0.02	0	0	0	0	0	0	0	0	0
HBEGF	118.12	26.09	96.97	7.94	1.4	1.55	1.46	2.59	2.33	1.73	0.32	1.71	8.13	1.98	10.94	4.88	5.42
CD82	111.89	15.28	29.78	7.72	126.79	50.23	10.17	73.17	66.27	63.09	35.29	46.4	74.74	876.18	141.33	24.53	465.26
HSP90AA1	243.99	343.7	270.12	277.4	222.4	567.05	283.06	324.47	245.82	390.08	339.15	663.93	360.8	368.83	623.43	431.79	331.46
ICAM1	1233.48	182.99	149.49	51.92	36.46	20.15	5.78	19.92	12.03	9.04	19.32	178.1	267.55	4096.77	193.05	104.49	1159.43
IFNA1
IFNA10
IFNA13
IFNA14
IFNA16
IFNA17
IFNA2
IFNA21
IFNA4
IFNA5
IFNA6
IFNA7
IFNA8
IFNB1	1.65	0	0	0	0.09	0	0	0	0	0	0	0	0.12	0	0	0	0
IFNG	17.63	0	0	0	0.04	12.25	0.04	1.56	3.43	34.11	31.09	0.11	0.08	9.07	0	133.54	1.58
IFNW1
IL1R1	33.44	1.34	3.08	0	0.21	1.21	5.46	42.28	0.02	0.27	0.52	44.6	1.28	66.64	5.14	0.84	28.61
IL1R2	8.36	1.2	6.29	0.06	1.06	0.41	0.17	5.6	0	0.13	1.49	13.69	1.63	1841.12	4.51	0.7	1218.81
IL1RAP	45.33	7.67	23.31	6.71	6.43	11.75	4.62	6.52	5.23	3.92	9.22	77.77	2.08	461.46	5.44	9.93	498.29
IL2RA	5.66	0	0.04	0.1	15.72	28.81	351.98	461.11	50.77	23.54	10.45	1.5	0	11.05	11.54	10.05	2.08
IL2RG	146.01	132.75	68.65	78.6	345.16	339.71	399.7	708.32	520.16	620.22	481.99	141.22	184.6	553.79	242.43	476.18	592.96
IL6R	190.54	51.58	84.78	16.74	6.59	30.98	31.96	37.45	25.06	26.91	16.66	28.8	22.76	132.87	30.62	12.21	172.33
IL6ST	198.61	28.3	65.5	11.96	29.79	333.09	210.05	64.29	178.96	108.87	113.63	100.51	96.51	63.2	32.27	133.01	65.1
IL7	8.62	1.48	1.41	2.64	24.7	2.46	0.24	13.15	0.27	2.79	0.91	3.53	0.4	1.32	3.25	2.77	0.39
ITGA2	0	0	0	0	0.17	0.2	0.04	1.98	3.23	2.71	0.3	0.04	0.08	0	0.05	0	0.14
ITGA3	0.46	0	0	0	1.35	1.75	2.71	3.63	1.75	1.57	0.7	16.63	0.2	0	22.9	0.96	0
ITGA6	9.62	0.14	0.04	0	0.92	59.81	63.24	27.08	92.67	49.8	47.15	6.45	0.24	9.77	58.41	24.65	14.4
ITGA9	0.79	0.28	0.67	0.1	0.09	0	0.04	0	0.15	0.03	0	0.06	0.31	0	0.71	0	0.28
ITGAL	134.94	158.57	121.57	240.41	27.92	121.95	111.73	190.82	210.33	186	173.39	8.13	50.34	115.15	31.82	277.17	167.4
ITGAM	144.59	57.23	160.72	18.66	18.39	2.94	44.42	45.13	13.2	18.69	29.44	528.75	5.51	167.99	290.45	102.91	408.12
ITGAV	156.59	9.43	11.94	9.59	3.32	12.04	5.99	9.04	4.51	7.95	12.74	39.89	10.94	5.89	61.16	26.88	3.24
ITGAX	404.56	340.6	305.89	365.38	23.54	2.53	2.29	7.3	1.99	5.76	11.78	719.29	23.96	2655.1	710.38	71.85	1538.36
ITGB1	140.31	75.92	72.52	85.03	100.29	146.11	41.33	146.46	18.11	155.73	164.33	253.13	42.43	26.67	237.94	155.78	38
ITGB2	1502.64	1161.82	1727.65	993.24	189.15	336.91	257.21	308.41	400.02	379.46	484.04	1329.93	197.85	1778.81	1915.63	748.73	1840.03
ITGB4	0.07	0.07	0	0	0	0.13	0	0.05	0.14	0.09	0.08	0	0	11.67	0	0	3.79
KDR	0	0	0	0	0	0	0	0	0	0	0	0	0	0	0.08	0.04	0
KNG1	0	0	0	0	0	0	0	0	0	0	0	0	0	0	0	0	0
L1CAM	0.14	0.07	0.04	0.07	3.22	0.93	0.08	1.8	0.3	0.99	0.41	0.31	0.08	0	0.23	0.54	1
MLLT4	5.55	0.91	0.85	1.74	4.92	3.75	1.27	6.72	2.36	1.84	2.36	3.02	2.25	22.29	1.63	6.96	12.77
NGFR	0.26	0.49	0.05	0.24	0.09	0.73	0.04	0.07	0.05	0	0.44	0	0.9	0	0	1.13	0.25
NGFRAP1	4.98	0.49	0.71	0.27	2.59	24.39	51.41	32.63	30.24	31.12	21.14	5.29	5.05	5.85	37.42	6.35	9.74
NRG4	0.27	0.07	0.43	0	0	0	0	0	0	0	0	0.04	0	0	0.28	0	0
NRP1	13.17	0.56	2.18	0.19	0.18	0.13	0	1.34	0.45	0.17	0.21	242.01	172.27	0	307.04	0.67	0
NRP2	33.15	2.67	2.67	0.31	1.75	0.13	0.65	0.98	15.6	0.32	0.13	68.94	1.03	0	145.82	0.48	0
NTRK2	0.07	0.07	0	0.07	0	0.99	0.2	0.71	0.61	0.21	0.04	0.04	0	0	0	0.32	0
PDGFB	1.58	0	0	0	0.09	0.6	0.4	0.13	0.04	0.48	1.87	21.14	4.86	0	7.15	0.63	0.66
PDGFC	11.54	14.03	8.63	15.04	0.06	0.07	0	0.05	0	0	0.18	25.31	9.14	2.6	18.25	0.28	0.5
PGF	0.18	0	0	0	0	0.07	0	0.02	0	0	0.02	0.13	0	0	0.05	0.04	0.14
PIGF	11.6	33.85	24.92	36.89	35.31	8.72	34.3	32.04	32.55	30.91	32.27	18.23	28.8	2.64	36.14	10.53	4.95
PLG
PRLR	46.78	3.03	6.66	1.6	0.09	0.27	0	0.08	0	0	0.11	0.19	0.93	0	1.86	0.69	0
RET	0.07	0	0	0.07	0.12	0	0	0.16	0.08	0.15	0	0	18.25	0	0.13	0	0.28
SDC1	0	0	0	0	0.51	0	0	0	0	0	0	0.64	0	0	2.66	0	0
SDC4	99.24	2.82	5.1	0	1.21	3.66	2.5	12.83	4.75	2.97	1.59	66.31	5.65	4.54	76.8	6.97	1.47
SEMA3A	0.71	0.21	0	2.62	0.09	0.2	0.08	0	1.71	0.25	0.29	1.12	0	0	7.24	0.04	0.14
SEMA3B	0	0.14	0.09	0.31	0	0	0	0	0	0	0	0	0	0	0	0	0
SEMA3C	60.03	4.02	9.49	4.64	0.16	0.07	0.04	0.02	0.04	0.06	0.31	72.21	33.2	3.92	23.77	1.22	7.12
SEMA3F	5.03	0.63	1.5	0.16	0.13	0.2	0.08	0.02	0	0.03	0.04	0	0.16	0	0	0.32	0.53
SEMA3G	0.13	0	0	0	0.2	1.28	0.54	12.5	0.02	0.79	0.26	5.02	0.12	0	0.05	0.27	0
SEMA4F	1.69	0	0.23	0.35	7.95	8.46	13.59	11.69	12.35	10.5	9.61	2.28	0.47	0	1.54	8.33	0.78
SIRPA	161.89	22.11	74.7	4.16	1.82	0.67	0	0.09	0.05	0.1	0.86	109.76	5.03	373.94	155.38	4.17	259.69
SORT1	25.24	34.86	39.34	49.44	0.22	0.14	0.04	0.35	0.91	0.55	1.11	95.87	15.1	15.04	67.06	0.99	34.91
SPINK1	0	0	0	0	0	0	0	0	0	0	0	0	0	0	0	0	0
SPP1	0.44	0.07	0.04	0	0.05	0	0.29	2.01	0.44	0	0	1335.28	0.19	6.48	8195.49	0	7.52
TGFBR3	18.18	0	0	0.1	0.19	30.29	3.71	14.55	5.38	17.67	44.49	0.41	5.63	5.23	0	96.24	1.88
TNC	0.37	0	0	0	0	0	0	0	0.05	0	0	2.54	0	0	0.74	0	0
TNFSF10	22.58	340.21	216.4	316	30.36	10.11	11.45	82.53	139.28	59.62	35.68	2.98	8.16	105.57	13.91	14.35	175.57
TSLP	0.78	0.21	0.29	0.26	0	0.13	0.17	0.17	0.56	0.1	0.58	0.7	0.08	0	0.1	0.11	0
TYRO3	0.27	0	0.05	0	0.03	0.21	0.08	0.48	0.22	0.14	0.15	0.15	0.19	0	0.71	0.36	0
UBA52
VCAN	805.71	203.68	1641.13	34.97	12.16	3.1	0	0.07	1.18	0.48	19.84	1.13	40.97	9.81	18.56	27.49	2.05
VEGFA	123.4	9.43	47.56	0.06	1.32	1.81	0.16	0.75	0.66	1.05	0.81	7.43	9.19	158.34	2.43	6.3	20.43
VEGFB	6.46	2.74	2.76	0.52	27.39	14.8	16.62	10.2	17.19	15.24	12.83	52.98	92.13	9.77	68.31	15.98	4.35
VEGFC	0.55	0	0	0	0.05	0	0.49	0	0	0	0	0	0	0	0.05	0	0.14
XCR1	0	0	0	0	0.05	0	0.04	0.02	0	0	0.12	0	0	0	0	0.28	0
ZP3	2.06	2.53	3.98	0.86	1.65	0.86	1.75	0.24	2.29	0.94	0.93	1.12	0.84	0	1.62	0.59	0
